# Supplementary material
Source: PubMed Central journal article supplement (PMC10592574)
Supplement: NIHMS1900999-supplement-supinfo.pdf [file NIHMS1900999-supplement-supinfo.pdf]

# Macrocyclic $\beta$ -Sheet Stabilized by Hydrogen Bond Surrogates

Alex Nazzaro, Brandon Lu, Nicholas Sawyer, Andrew Watkins, and Paramjit S. Arora\*  
*Department of Chemistry, New York University. 100 Washington Square East, New York, NY.  
10013.*

## Supplementary Information

### Table of Contents

|                                                                                                           | page |
|-----------------------------------------------------------------------------------------------------------|------|
| <b>Supplementary Figures</b>                                                                              | 2-10 |
| <b>Figure S1:</b> Synthesis of HBS $\beta$ -Sheet peptides                                                |      |
| <b>Figure S2:</b> Dataset of cross-strand interactions                                                    |      |
| <b>Figure S3:</b> CD Spectra                                                                              |      |
| <b>Figure S4:</b> Thermal denaturation of HBS $\beta$ -Sheet <b>5</b>                                     |      |
| <b>Figure S5:</b> Crystal Structure of HBS $\beta$ -Sheet <b>5</b>                                        |      |
| <b>Table S1:</b> X-ray Data collection, phasing and refinement statistics for HBS $\beta$ -Sheet <b>5</b> |      |
| <b>Materials and Methods</b> .....                                                                        | 11   |
| Synthesis of S-Monomethoxytrityl (Mmt) Cysteamine                                                         |      |
| PDB Non-Hydrogen Bonded Residue Heatmap                                                                   |      |
| Crystallization of HBS $\beta$ -Sheet <b>5</b>                                                            |      |
| <b>Characterization Data</b> .....                                                                        | 13   |
| <b>Analytical HPLC Traces</b> .....                                                                       | 13   |
| <b>NMR Spectroscopy</b> .....                                                                             | 17   |
| 2D NMR                                                                                                    |      |
| H $\alpha$ for HBS Sheet Peptides Utilized in 2D NMR Analyses                                             |      |
| Chemical Shift Deviation Calculations                                                                     |      |
| HBS 1 - Amide Fingerprint Region TOCSY/ROESY                                                              |      |
| HBS 3 - Amide Fingerprint Region TOCSY/ROESY                                                              |      |
| HBS 5 - Amide Fingerprint Region at 298 K TOCSY/ROESY                                                     |      |
| <b>Supplementary References</b> .....                                                                     | 24   |

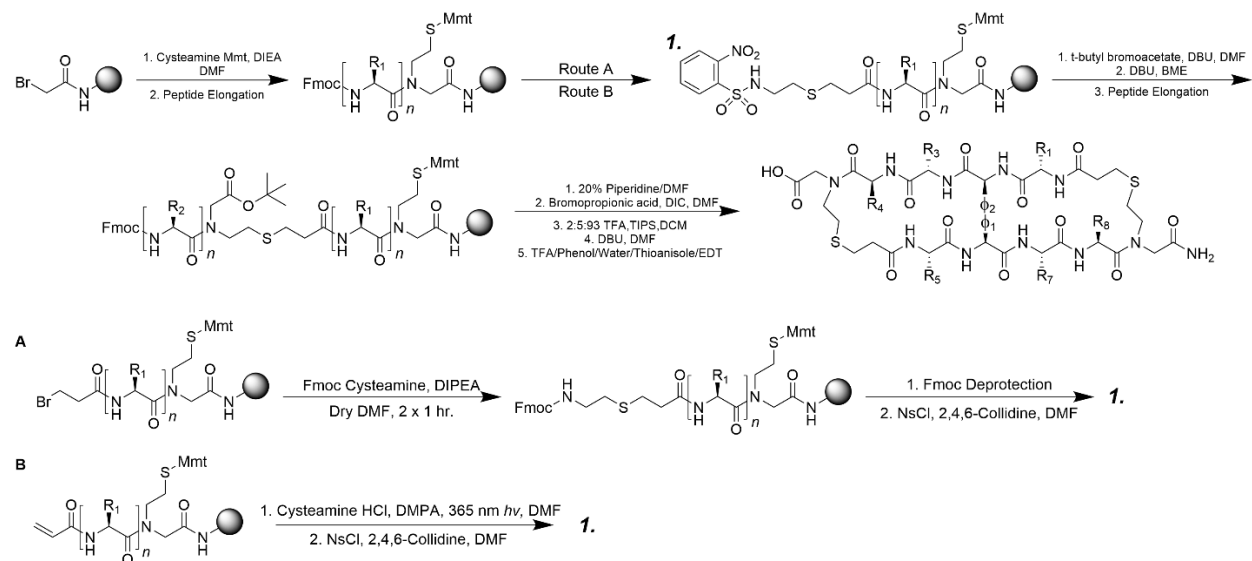

**Figure S1.** General scheme for synthesis of HBS Sheet. Two different methods (A and B) were tested for formation of the HBS thioether linkages.

|   | A     | C    | D     | E     | F     | G     | H     | I     | K     | L      | M     | N     | P     | Q     | R     | S     | T     | V      | W     | Y     |
|---|-------|------|-------|-------|-------|-------|-------|-------|-------|--------|-------|-------|-------|-------|-------|-------|-------|--------|-------|-------|
| A | 8798  | 2290 | 4092  | 5582  | 25448 | 4655  | 6378  | 28606 | 5094  | 39756  | 7017  | 5345  | 2835  | 6694  | 11005 | 7832  | 13429 | 34363  | 13705 | 23376 |
| C | 2290  | 2184 | 1098  | 1528  | 9243  | 1699  | 1837  | 8032  | 1720  | 8453   | 3302  | 1271  | 1667  | 1452  | 2872  | 2002  | 3132  | 9483   | 2925  | 4876  |
| D | 4092  | 1098 | 4970  | 5521  | 6795  | 3685  | 9756  | 9233  | 19284 | 8511   | 2089  | 7578  | 1747  | 6887  | 25558 | 11358 | 14779 | 9170   | 4843  | 12902 |
| E | 5582  | 1528 | 5521  | 7550  | 14424 | 5925  | 13345 | 14618 | 37847 | 21439  | 4299  | 8913  | 3130  | 9252  | 40271 | 16423 | 25807 | 22749  | 8768  | 23748 |
| F | 25448 | 9243 | 6795  | 14424 | 50492 | 18295 | 8290  | 53989 | 13168 | 65165  | 17866 | 8096  | 8889  | 13527 | 17456 | 20986 | 21752 | 67929  | 17161 | 34670 |
| G | 4655  | 1699 | 3685  | 5925  | 18295 | 3084  | 4234  | 9513  | 3224  | 15916  | 5035  | 5704  | 1628  | 4770  | 6832  | 6640  | 7020  | 10349  | 8453  | 15475 |
| H | 6378  | 1837 | 9756  | 13345 | 8290  | 4234  | 11494 | 9532  | 6268  | 13714  | 3419  | 5621  | 2710  | 6413  | 9242  | 11681 | 12600 | 16369  | 6831  | 12512 |
| I | 28606 | 8032 | 9233  | 14618 | 53989 | 9513  | 9532  | 67618 | 15339 | 75476  | 16191 | 8293  | 5259  | 12389 | 19091 | 14960 | 24250 | 87616  | 14932 | 36031 |
| K | 5094  | 1720 | 19284 | 37847 | 13168 | 3224  | 6268  | 15339 | 4534  | 13551  | 5793  | 9602  | 2549  | 10143 | 5865  | 12762 | 24878 | 21229  | 10287 | 28688 |
| L | 39756 | 8453 | 8511  | 21439 | 65165 | 15916 | 13714 | 75476 | 13551 | 95540  | 21417 | 9861  | 9462  | 20976 | 22665 | 20882 | 26801 | 109004 | 23166 | 48821 |
| M | 7017  | 3302 | 2089  | 4299  | 17866 | 5035  | 3419  | 16191 | 5793  | 21417  | 6354  | 3527  | 3172  | 3858  | 6943  | 5675  | 6932  | 20362  | 4494  | 9573  |
| N | 5345  | 1271 | 7578  | 8913  | 8096  | 5704  | 5621  | 8293  | 9602  | 9861   | 3527  | 10226 | 3376  | 8976  | 9013  | 17389 | 13275 | 11447  | 6056  | 12815 |
| P | 2835  | 1667 | 1747  | 3130  | 8889  | 1628  | 2710  | 5259  | 2549  | 9462   | 3172  | 3376  | 836   | 3542  | 4428  | 2855  | 5413  | 7590   | 4767  | 10386 |
| Q | 6694  | 1452 | 6887  | 9252  | 13527 | 4770  | 6413  | 12389 | 10143 | 20976  | 3858  | 8976  | 3542  | 9296  | 11793 | 10847 | 22742 | 16867  | 7411  | 18520 |
| R | 11005 | 2872 | 25558 | 40271 | 17456 | 6832  | 9242  | 19091 | 5865  | 22665  | 6943  | 9013  | 4428  | 11793 | 10596 | 16155 | 23522 | 29230  | 12383 | 29623 |
| S | 7832  | 2002 | 11358 | 16423 | 20986 | 6640  | 11681 | 14960 | 12762 | 20882  | 5675  | 17389 | 2855  | 10847 | 16155 | 18460 | 31669 | 21983  | 11966 | 21299 |
| T | 13429 | 3132 | 14779 | 25807 | 21752 | 7020  | 12600 | 24250 | 24878 | 26801  | 6932  | 13275 | 5413  | 22742 | 23522 | 31669 | 68234 | 40118  | 11345 | 23777 |
| V | 34363 | 9483 | 9170  | 22749 | 67929 | 10349 | 16369 | 87616 | 21229 | 109004 | 20362 | 11447 | 7590  | 16867 | 29230 | 21983 | 40118 | 118506 | 21202 | 50569 |
| W | 13705 | 2925 | 4843  | 8768  | 17161 | 8453  | 6831  | 14932 | 10287 | 23166  | 4494  | 6056  | 4767  | 7411  | 12383 | 11966 | 11345 | 21202  | 11016 | 16179 |
| Y | 23376 | 4876 | 12902 | 23748 | 34670 | 15475 | 12512 | 36031 | 28688 | 48821  | 9573  | 12815 | 10386 | 18520 | 29623 | 21299 | 23777 | 50569  | 16179 | 33688 |

**Figure S2-a:** Dataset of cross-strand interacting residues at non-hydrogen bonded positions in antiparallel  $\beta$ -sheets.

|   | A    | C    | D    | E    | F    | G   | H    | I    | K    | L    | M    | N    | P    | Q    | R    | S    | T    | V   | W    | Y    |
|---|------|------|------|------|------|-----|------|------|------|------|------|------|------|------|------|------|------|-----|------|------|
| A | 211  | 218  | 195  | 170  | 695  | 139 | 423  | 529  | 253  | 633  | 558  | 316  | 205  | 328  | 337  | 231  | 297  | 426 | 1017 | 684  |
| C | 218  | 822  | 207  | 184  | 998  | 201 | 482  | 587  | 338  | 532  | 1039 | 298  | 478  | 282  | 348  | 234  | 274  | 465 | 859  | 564  |
| D | 195  | 207  | 468  | 333  | 367  | 218 | 1279 | 338  | 1896 | 268  | 329  | 887  | 250  | 669  | 1549 | 664  | 646  | 225 | 711  | 747  |
| E | 170  | 184  | 333  | 291  | 499  | 224 | 1120 | 342  | 2383 | 432  | 433  | 668  | 287  | 575  | 1564 | 615  | 722  | 358 | 824  | 880  |
| F | 695  | 998  | 367  | 499  | 1565 | 621 | 624  | 1133 | 743  | 1178 | 1613 | 544  | 731  | 754  | 607  | 704  | 546  | 957 | 1446 | 1152 |
| G | 139  | 201  | 218  | 224  | 621  | 114 | 349  | 218  | 199  | 315  | 498  | 419  | 147  | 291  | 260  | 244  | 193  | 160 | 779  | 563  |
| H | 423  | 482  | 1279 | 1120 | 624  | 349 | 2099 | 486  | 859  | 602  | 749  | 917  | 541  | 867  | 781  | 951  | 767  | 560 | 1397 | 1009 |
| I | 529  | 587  | 338  | 342  | 1133 | 218 | 486  | 961  | 586  | 924  | 990  | 377  | 293  | 467  | 450  | 340  | 412  | 835 | 852  | 810  |
| K | 253  | 338  | 1896 | 2383 | 743  | 199 | 859  | 586  | 466  | 446  | 952  | 1175 | 382  | 1029 | 372  | 779  | 1136 | 544 | 1578 | 1735 |
| L | 633  | 532  | 268  | 432  | 1178 | 315 | 602  | 924  | 446  | 1007 | 1128 | 386  | 454  | 682  | 460  | 408  | 392  | 895 | 1138 | 946  |
| M | 558  | 1039 | 329  | 433  | 1613 | 498 | 749  | 990  | 952  | 1128 | 1671 | 690  | 760  | 626  | 704  | 554  | 506  | 835 | 1103 | 926  |
| N | 316  | 298  | 887  | 668  | 544  | 419 | 917  | 377  | 1175 | 386  | 690  | 1490 | 602  | 1084 | 680  | 1264 | 722  | 350 | 1106 | 923  |
| P | 205  | 478  | 250  | 287  | 731  | 147 | 541  | 293  | 382  | 454  | 760  | 602  | 183  | 524  | 409  | 254  | 360  | 284 | 1066 | 916  |
| Q | 328  | 282  | 669  | 575  | 754  | 291 | 867  | 467  | 1029 | 682  | 626  | 1084 | 524  | 931  | 738  | 654  | 1025 | 427 | 1122 | 1106 |
| R | 337  | 348  | 1549 | 1564 | 607  | 260 | 781  | 450  | 372  | 460  | 704  | 680  | 409  | 738  | 414  | 608  | 662  | 462 | 1171 | 1105 |
| S | 231  | 234  | 664  | 615  | 704  | 244 | 951  | 340  | 779  | 408  | 554  | 1264 | 254  | 654  | 608  | 670  | 859  | 335 | 1091 | 765  |
| T | 297  | 274  | 646  | 722  | 546  | 193 | 767  | 412  | 1136 | 392  | 506  | 722  | 360  | 1025 | 662  | 859  | 1385 | 457 | 773  | 639  |
| V | 426  | 465  | 225  | 358  | 957  | 160 | 560  | 835  | 544  | 895  | 835  | 350  | 284  | 427  | 462  | 335  | 457  | 758 | 812  | 763  |
| W | 1017 | 859  | 711  | 824  | 1446 | 779 | 1397 | 852  | 1578 | 1138 | 1103 | 1106 | 1066 | 1122 | 1171 | 1091 | 773  | 812 | 2522 | 1461 |
| Y | 684  | 564  | 747  | 880  | 1152 | 563 | 1009 | 810  | 1735 | 946  | 926  | 923  | 916  | 1106 | 1105 | 765  | 639  | 763 | 1461 | 1199 |

**Figure S2-b:** Normalized dataset of cross-strand interacting residues at non-hydrogen bonded positions in antiparallel  $\beta$ -sheets. Data was normalized for natural abundance of each amino acid residue.

a)

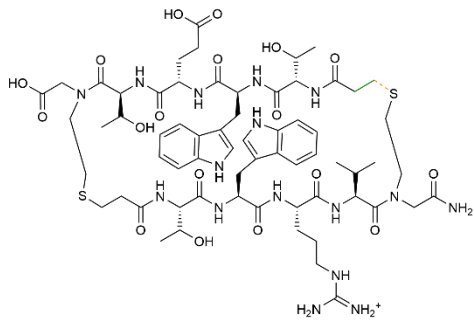

**HBS Sheet 1 & 1-Linear**

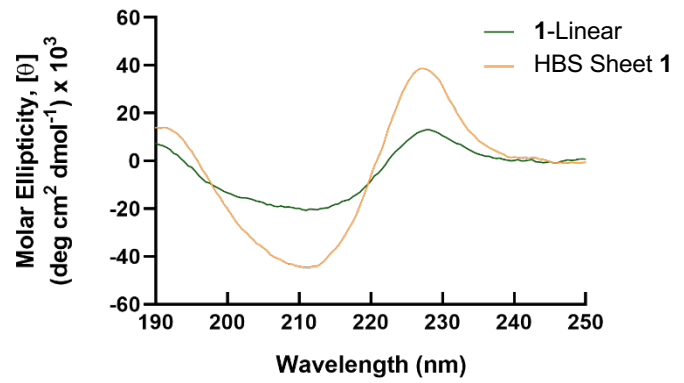

b)

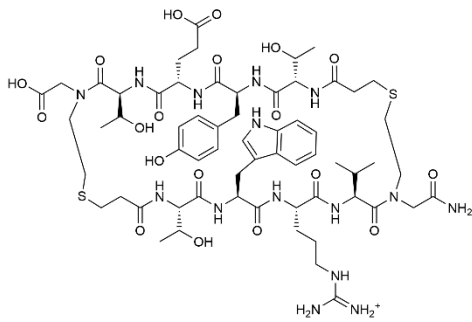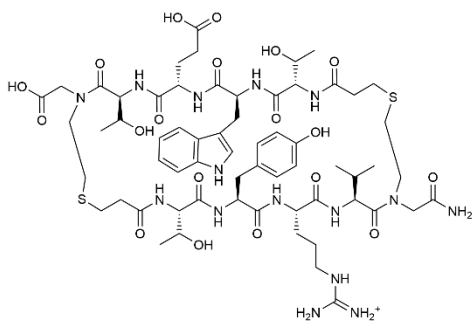

**HBS Sheet 4 (Top) & 5 (Bottom)**

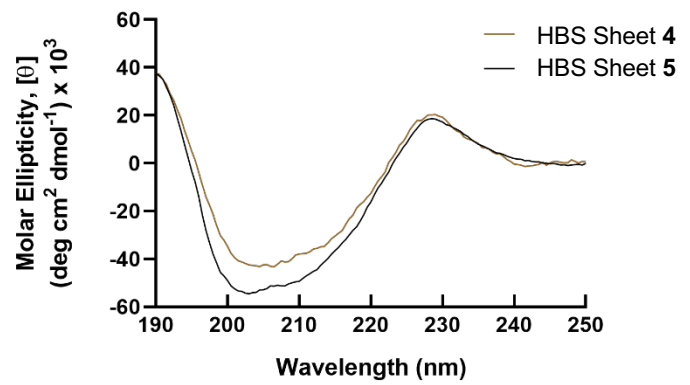

c)

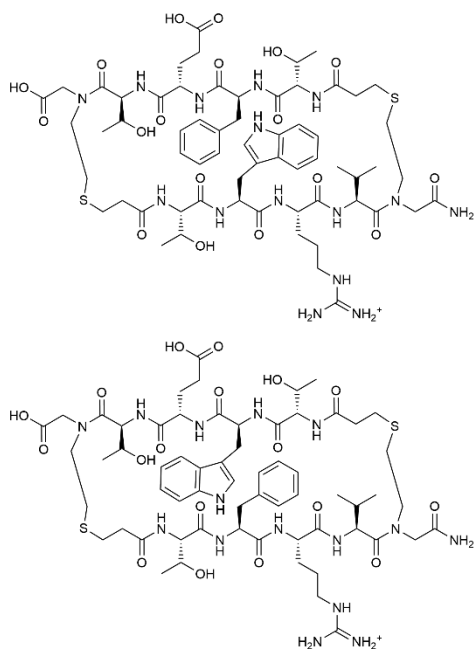

**HBS Sheet 2 (Top) & 10 (Bottom)**

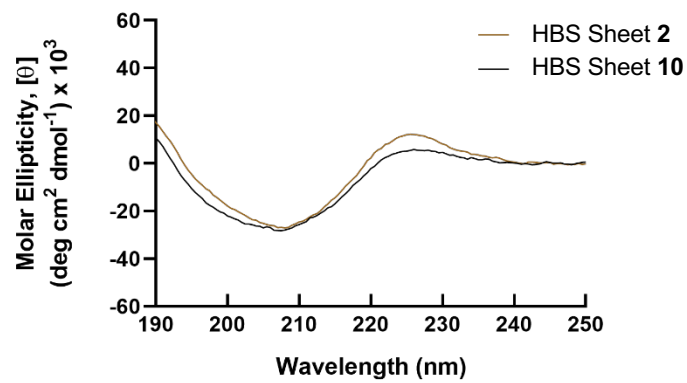

d)

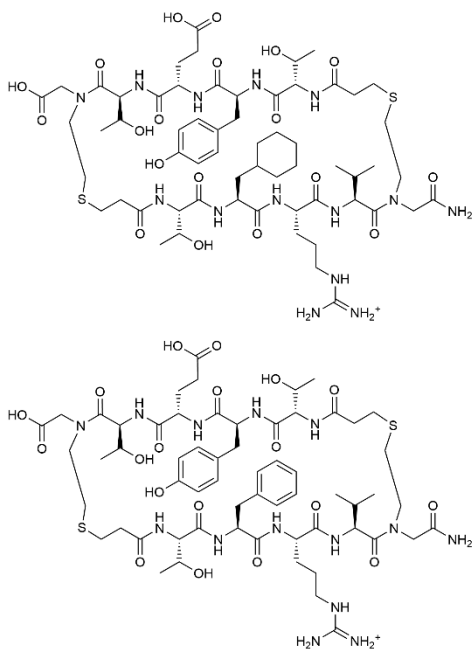

**HBS Sheet 6 (Top) & 7 (Bottom)**

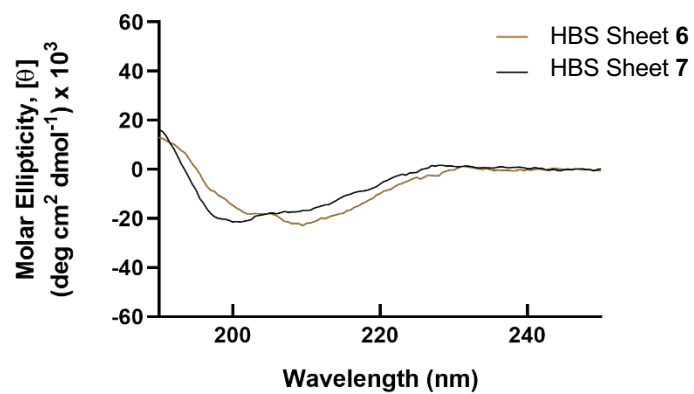

e)

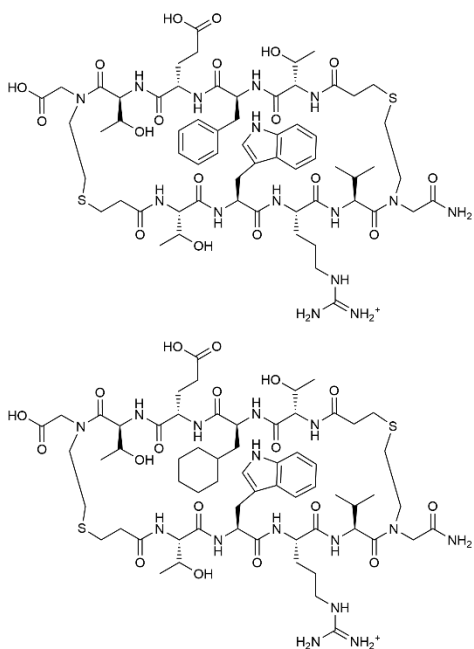

**HBS Sheet 2 (Top) & 3 (Bottom)**

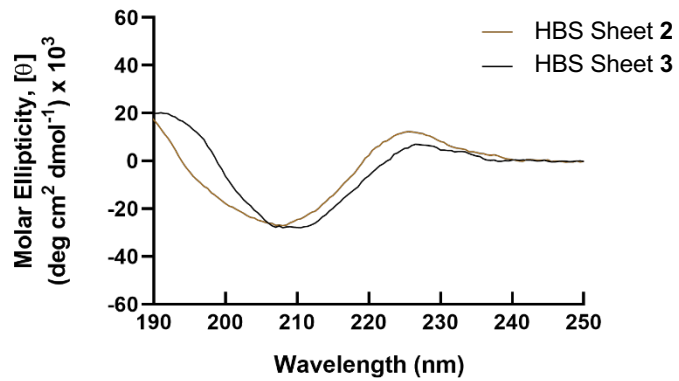

f)

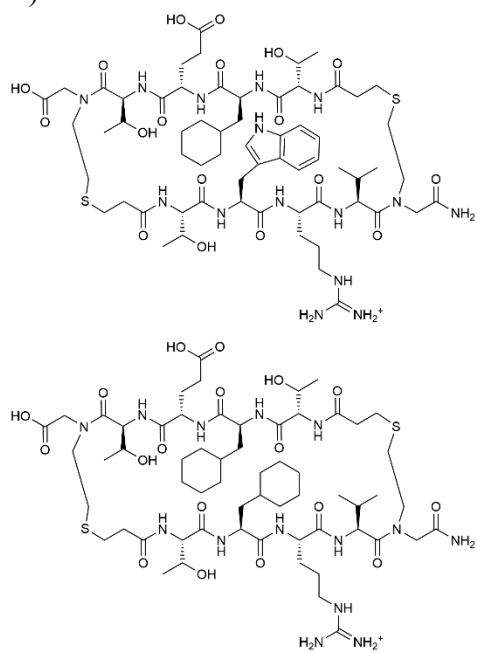

**HBS Sheet 3 (Top) & 11 (Bottom)**

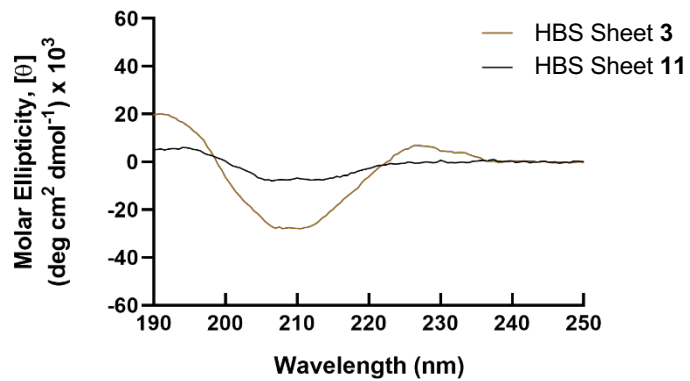

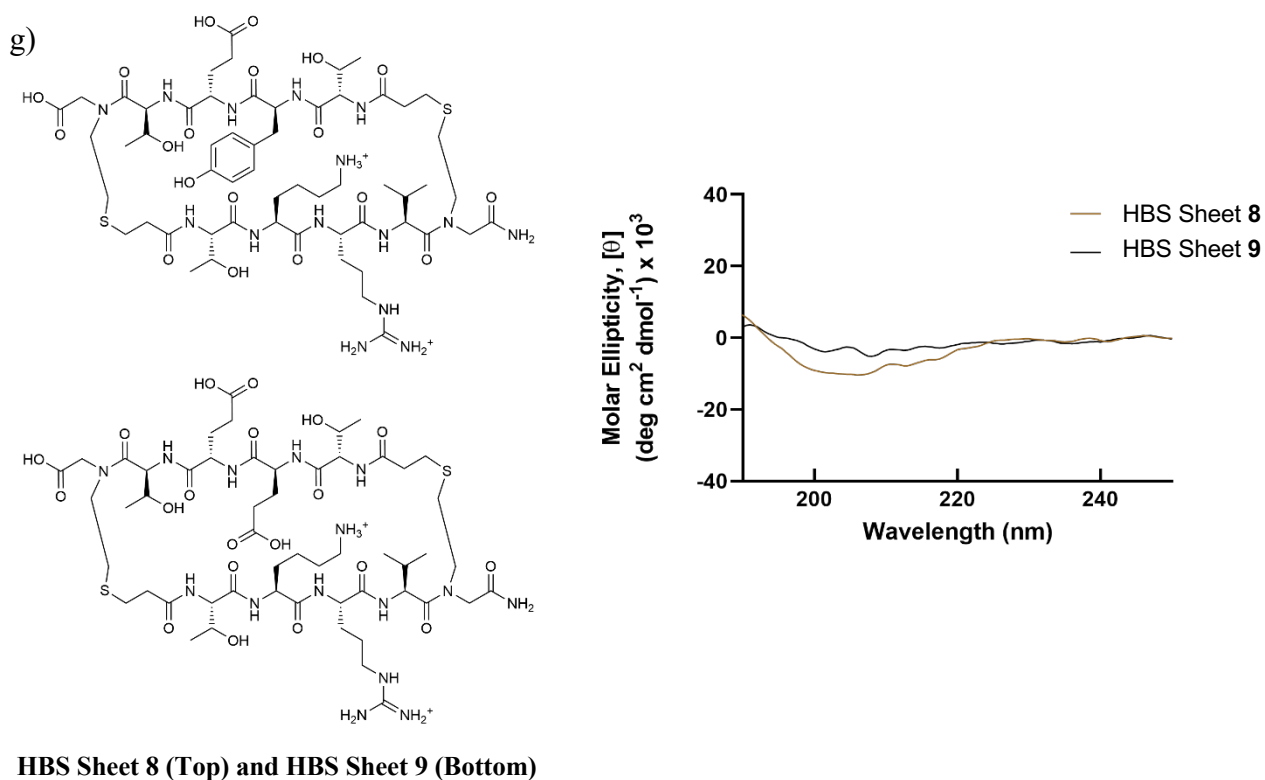

**Figure S3.** CD spectra of macrocyclic  $\beta$ -sheets. Spectra were obtained at a concentration of 30  $\mu\text{M}$  peptide in 10 mM potassium fluoride (pH 7.3).

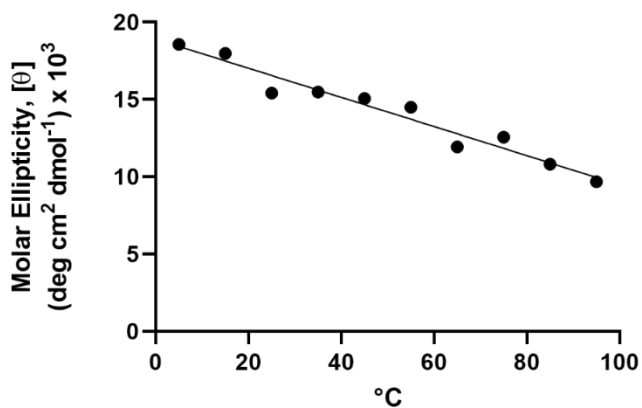

**Figure S4:** Thermal denaturation of  $\beta$ -sheet **5**. Plot shows change in 228 nm signal of **5** as a function of temperature. Full graph at different temperatures are shown in Figure 4C.



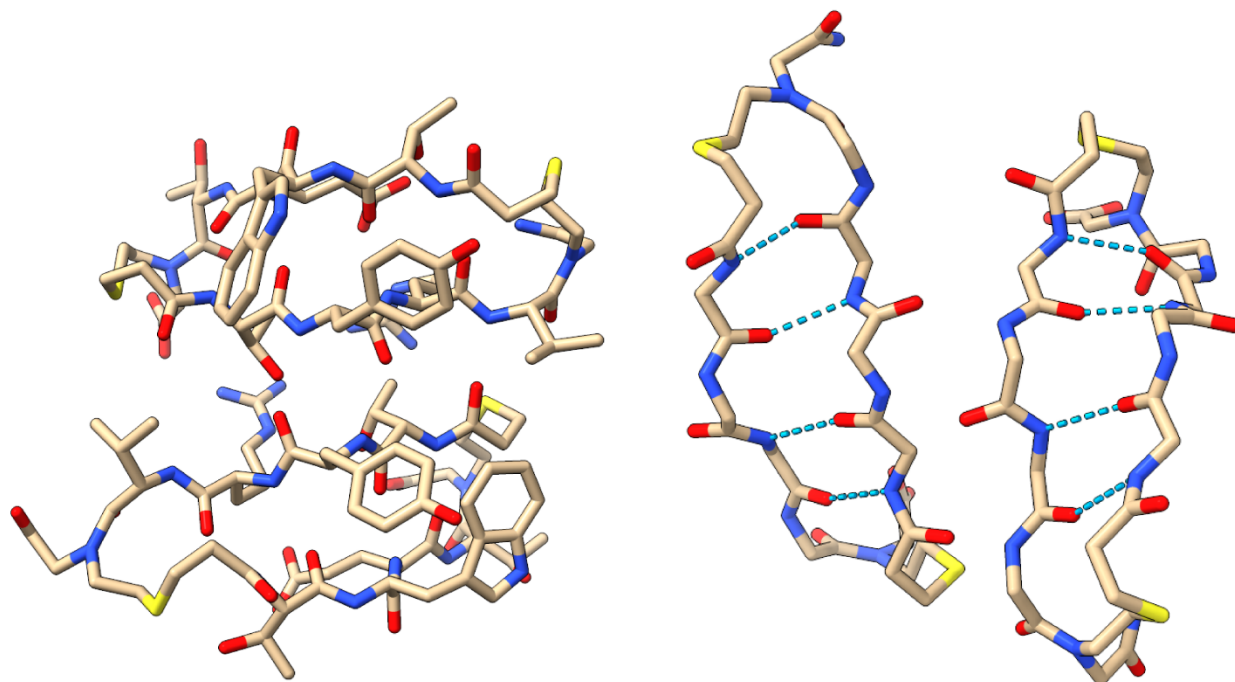

**Figure S5: Crystal Structure of 5.** Left: Full side-chain view. Each monomer has a different aromatic-aromatic orientation. Right: Backbone with hydrogen bonds.

**Supplementary Table 1.** X-ray Data collection, phasing and refinement statistics for HBS  $\beta$ -Sheet 5

| Beta-Sheet Peptide                                  |                            |
|-----------------------------------------------------|----------------------------|
| <b>Data collection</b>                              | <b>PDB (8DPY)</b>          |
| Wavelength (Å)                                      | 0.092010                   |
| Space Group                                         | P6 <sub>2</sub>            |
| Cell dimensions                                     |                            |
| <i>a</i> = <i>b</i> (Å)                             | 43.176                     |
| <i>c</i>                                            | 22.223                     |
| <i>a</i> = <i>b</i> (°)                             | 90                         |
| $\gamma$                                            | 90                         |
| Resolution (Å)                                      | 37.392-0.997 (1.056-0.997) |
| Ellipsoidal diffraction limits (Å) <sup>a</sup>     | 1.029, 1.029, 0.993        |
| <i>R</i> <sub>merge</sub>                           | 0.064 (1.430)              |
| <i>I</i> / <i>sI</i>                                | 16.2 (1.3)                 |
| CC <sub>1/2</sub>                                   | 1.000 (0.432)              |
| Completeness ellipsoidal (%)                        | 91.5 (39.8)                |
| Redundancy                                          | 9.7 (7.0)                  |
| <b>Refinement</b>                                   |                            |
| Resolution (Å)                                      | 21.59-0.997 (1.10-0.997)   |
| No. reflections                                     | 11290 (1430)               |
| <i>R</i> <sub>work</sub> / <i>R</i> <sub>free</sub> | 0.180/0.206 (0.260/0.318)  |
| No. atoms                                           | 241                        |
| <i>B</i> -factors                                   | 16.0                       |
| Protein                                             | 13.9                       |
| Ligand                                              | 22.1                       |
| Solvent                                             | 27.5                       |
| R.m.s deviations                                    |                            |
| Bond lengths (Å)                                    | 0.0185                     |
| Bond angles (°)                                     | 2.67                       |

\*Values in parentheses for highest resolution shell. Lack of parentheses indicates one shell only.

<sup>a</sup>Data scaling performed with ellipsoidal cutoff using the STARANISO server (Global Phasing).

## Materials and Methods

### General

Commercially purchased solvents and reagents were used without further purification. Amino acids and peptide synthesis reagents were purchased from Novabiochem or Chem-Impex International. Molecular biology grade salts and buffers were purchased from Sigma. Peptides were synthesized manually or using a Gyros Protein Technologies Prelude X automated peptide synthesizer and purified on preparative C18 columns using a combination of reverse-phase high-performance liquid chromatography (RP-HPLC) on a Thermo Fisher Scientific UltiMate 3000 HPLC. Peptide purity was evaluated on an Agilent 1260 Infinity series RP-HPLC with a diode array detector equipped with a C18 analytical column. High-resolution mass spectrometry data was collected on a Bruker UltrafleXtreme MALDI-TOF mass spectrometer.

### Synthesis and Purification of Peptides

Macrocyclized were synthesized using standard Fmoc solid-phase peptide synthesis on low-loaded (0.27 mmol/g) Knorr Rink Amide resin. Hairpin was synthesized with high-loading Knorr Rink Amide resin (0.61 mmol/g). Normal deprotection conditions of 20% (v/v) piperidine:DMF and coupling conditions of Fmoc-AA-OH (5 eq.), hydroxybenzotriazole (HOBt, 5 eq.), and diisopropylcarbodiimide (DIC, 5 eq.) were used unless otherwise noted. Upon completion of coupling steps, resin was washed with DCM 3x, methanol 3x, and DMF 3x.

Addition of the first N-alkylglycine, noted as G\*, was performed by first coupling bromoacetic acid (5 eq.) after pre-activation with hydroxy-7-azabenzotriazole (HOAt, 5 eq.) and DIC (5 eq.) in DMF. After washing, S-Mmt-cysteamine (5 eq.) and N,N-diisopropylethylamine (DIEA, 15 eq.) were added to the resin. After two hours of incubation, Fmoc-Val-OH (10 eq.) was preactivated with 10 equivalents each of HOAt and DIC and treated with the resin overnight. Standard peptide coupling conditions were followed to synthesize the first strand.

For synthesis of the second HBS bridge, two strategies were evaluated after Fmoc deprotection of the first strand (Route A & B).

**Route A:** 3-bromopropionic acid (5 eq.) was pre-activated with DIC (5 eq.) in DMF and coupled to the deprotected resin. After washing, the resin was treated with Fmoc-cysteamine (3 eq.) and DIPEA (3.3 eq.) in dry DMF twice for one hour each.

**Route B:** Acrylic acid (5 eq.) was preactivated with 5 equivalents each of HOBt and DIC in DMF and coupled for two hours. Cysteamine hydrochloride (10 eq.) and 2,2-dimethoxy-2-phenylacetophenone (0.5 eq.) were added to the resin in a scintillation vial, flushed with argon, and introduced to 365 nm UV light from a Kessil PR160-370 LED light for 25 minutes. The resin was then transferred back to the solid phase synthesis vessel and washed five times each with DMF and DCM.

After Fmoc deprotection, 2-nitrobenzylsulfonyl chloride (10 eq.) and 2,4,6-collidine (10 eq.) was coupled to the deprotected resin in dry DCM for two hours. Next, t-butyl bromoacetate (10 eq.) and 1,8-diazabicyclo[5.4.0]undec-7-ene (DBU, 10 eq.) were added to resin in DMF twice (one

hour each). Nosyl deprotection was carried out using 10 eq. each of DBU and  $\beta$ -mercaptoethanol (1x 1 hour, 3x 30 min).

Synthesis of the N-terminal strand was initiated with Fmoc-Thr-OH (10 eq.) coupled overnight to the secondary amine after pre-activation with 10 eq. of HOAt and DIC. Upon completion of the second strand 3-bromopropionic acid (5 eq.) was coupled to the resin for three hours after pre-activation with DIC (5 eq.). From there, a solution of 2% trifluoroacetic acid (TFA) and 5% triisopropylsilane in DCM was added to the resin (8x, 10 minutes each) to remove the Mmt group. After washing with DMF, DBU (5 eq.) in DMF was added to the resin for 30 minutes for ring closure.

Peptide cleavage was performed using a mixture of TFA/Phenol/Water/Thioanisole/EDT (82.5/5/5/5/2.5) for two hours. The cleavage solution was filtered with subsequent removal of solvent by rotary evaporation. Then the peptide was precipitated and washed (3x) with cold diethyl ether, filtered, and dissolved in a mixture of water: acetonitrile. The peptide was then purified via reverse-phase high-performance liquid chromatography (HPLC) using preparative-scale  $C_{18}$  columns.

### ***Dataset of Cross-strand Interacting Non-Hydrogen Bonded Residue***

Using the PDBe search methods to remove proteins at 30% sequence similarity, a nonredundant set of PDBs was obtained. Using the pre-computed DSSP assignments released by Kabsch & Sander<sup>[1]</sup>, PDBs containing an antiparallel strand pair with at least one hydrogen bond between them were recorded. For each such pair, residue pairs involving one residue from each strand making at least one atomic contact as well as making a backbone hydrogen bond were identified.

With this dataset, a heat map was constructed. This list of structures was filtered to identify only those residue pairs that were not making a backbone hydrogen bond and stored as raw counts in a 2D array to obtain raw relative frequencies. These counts were then normalized as described by Tsutsumi & Okami<sup>[2]</sup> to the baseline prevalence of each residue on antiparallel strands and then plotted using Seaborn's heatmap module. Non-normalized and normalized value tables are in Figure S2.

*The code and full set of results are available on GitHub:*  
[https://github.com/everyday847/strand\\_contact\\_analysis](https://github.com/everyday847/strand_contact_analysis)

### ***Circular Dichroism Spectroscopy***

Peptide concentrations were calculated based on absorbance values at 280 ( $A_{280}$ ) and extinction coefficients for tryptophan and tyrosine ( $\text{Trp} = 5690 \text{ cm}^{-1}\text{M}^{-1}$ ,  $\text{Tyr} = 1280 \text{ cm}^{-1}\text{M}^{-1}$ ). Circular dichroism spectra were acquired at room temperature using a Jasco J-1500 CD spectrometer at peptide concentration of 30  $\mu\text{M}$  in 10 mM potassium fluoride (pH 7.3) using a 0.1 cm pathlength cell.<sup>3</sup> For temperature-denaturation studies, HBS  $\beta$ -Sheet **5** spectra were acquired under the same conditions at 10° intervals from 5-95°C.

### ***Crystallization of HBS $\beta$ -Sheet 5***

**5** was dissolved in water to make a 4 mM stock solution. The crystallization buffer of 1.4 M phosphate buffer at pH 7.25 was prepared and filtered through a nylon filter. A 24 well-plate was utilized for hanging-drop crystallization. Mixtures of 1:1, 1:2, and 1:3 microliters of **5** to buffer were then placed on glass slides before sealed onto separate wells with reservoir buffer being the same as the crystallization buffer. Chosen samples were then cryoprotected in a final solution of 30% glycerol and crystallization buffer (pH 7.14) before X-ray diffraction experiments.

### ***X-ray diffraction data collection, processing and structure determination***

X-Ray diffraction data were collected on AMX 17-ID-1 of the National Synchrotron Light Source II, a U.S. Department of Energy (DOE) Office of Science User Facility operated for the DOE Office of Science by Brookhaven National Laboratory.<sup>[3]</sup> The diffraction data were processed using the automatic data processing package autoPROC (Global Phasing, Cambridge, UK), which automatically indexes the data for space group determination, integrates the data in the space group using XDS, and scales the data using AIMLESS.<sup>[4]</sup> Results from X-ray diffraction were processed for isotropy using the STARANISO server (Global Phasing) to remove directional dependence of the resolution, allowing for an ellipsoidal resolution cutoff which increases the resolution limit.<sup>[5]</sup> Structures were solved using molecular replacement using the NMR model. Initial molecular replacement was successful using two copies of the NMR model. PHENIX Refine was used to finish refinement of the structure with minimal additional refinement in Coot.<sup>[6]</sup> The Coot program,<sup>[6]</sup> UCSF ChimeraX,<sup>[7]</sup> were used to model crystal structures and create figures. Data collection and refinement statistics are shown in Supplementary Table 1.

## **Characterization Data .....**

### ***Analytical HPLC traces and MALDI-TOF mass characterization***

Analytical HPLC chromatogram for purified peptides are shown. Conditions: 5 – 95% gradient in solvent B (ACN + 5% H<sub>2</sub>O + 0.1% TFA), solvent A (H<sub>2</sub>O + 0.1% TFA) across 12-16 minutes on a XTerra RP<sub>18</sub> 3.5  $\mu$ m 2.1 x 150 mm column (Part No. 186000410). Absorbance values observed for 220 nm on an Agilent Infinity 1260 UV/DAD. Observed mass for each peptide on a Bruker UltrafleXtreme MALDI-TOF are noted along with calculated mass.

**HBS Sheet 1:**  $[M+H]^+$  Calculated for  $C_{64}H_{93}N_{16}O_{18}S_2 = 1436.62$ ; Observed = 1435.62

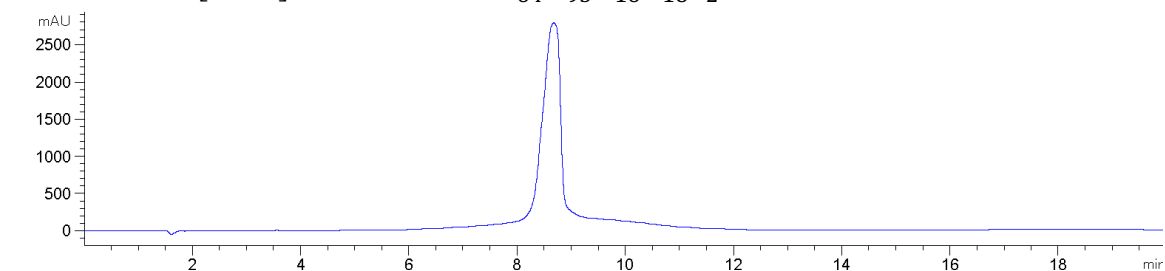

**HBS Sheet 2:**  $[M+H]^+$  Calculated for  $C_{62}H_{92}N_{15}O_{18}S_2 - 1398.62$ ; Observed = 1398.48

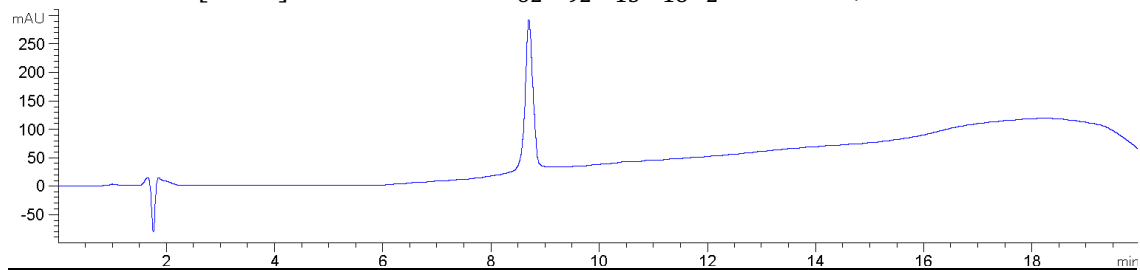

**HBS Sheet 3:**  $[M+H]^+$  Calculated for  $C_{62}H_{98}N_{15}O_{18}S_2 - 1404.67$ ; Observed = 1403.26

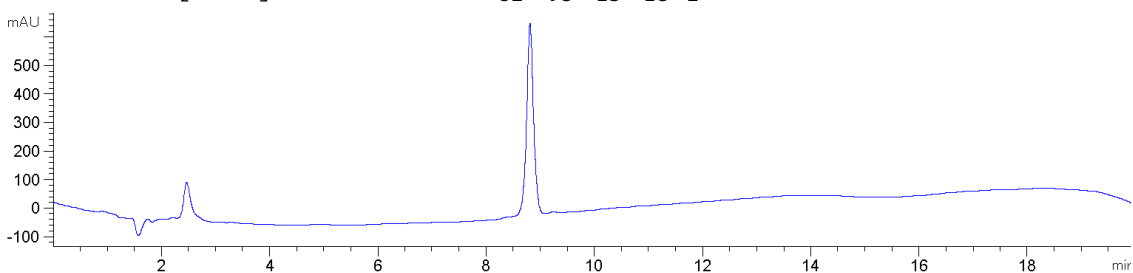

**HBS Sheet 4:**  $[M+H]^+$  Calculated for  $C_{62}H_{92}N_{15}O_{19}S_2 - 1414.61$ ; Observed = 1413.16

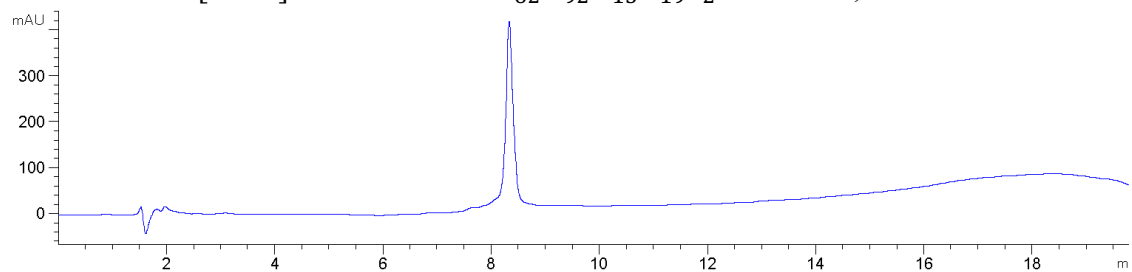

**HBS Sheet 5:**  $[M+H]^+$  Calculated for  $C_{62}H_{92}N_{15}O_{19}S_2$  – 1414.61; Observed = 1414.83

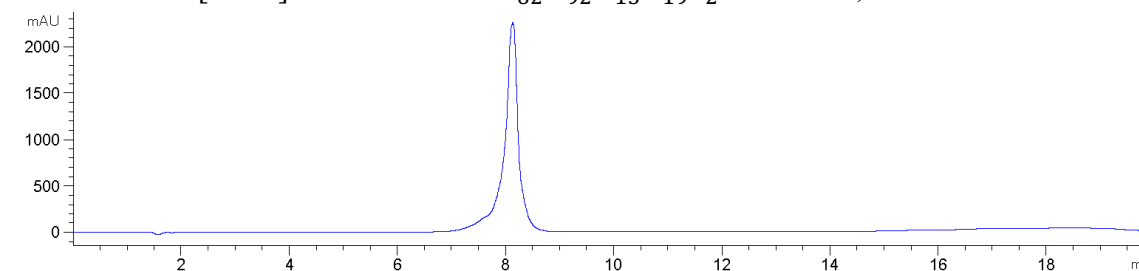

**HBS Sheet 6:**  $[M+H]^+$  Calculated for  $C_{60}H_{97}N_{14}O_{19}S_2$  – 1381.65; Observed = 1382.55

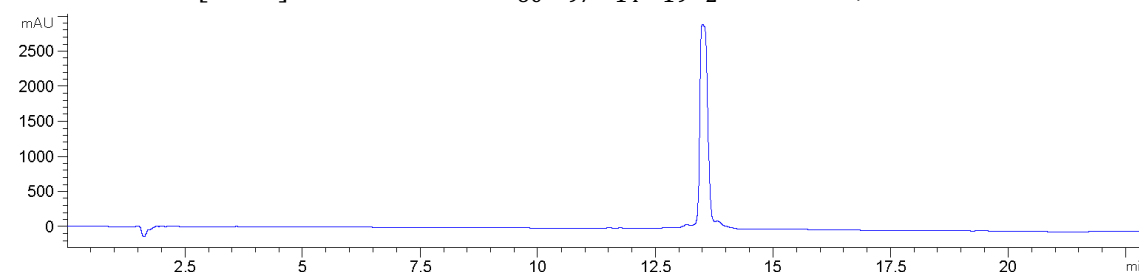

**HBS Sheet 7:**  $[M+H]^+$  Calculated for  $C_{60}H_{91}N_{14}O_{19}S_2$  – 1375.60; Observed = 1375.99

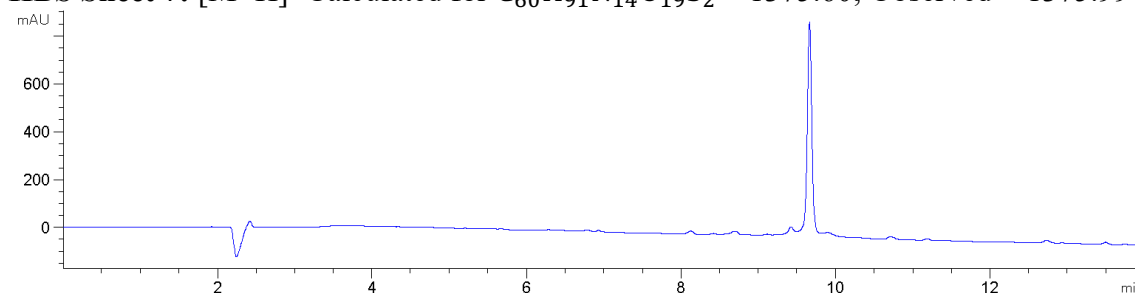

**HBS Sheet 8:**  $[M+H]^+$  Calculated for  $C_{57}H_{95}N_{15}O_{19}S_2$  – 1357.64; Observed = 1356.63

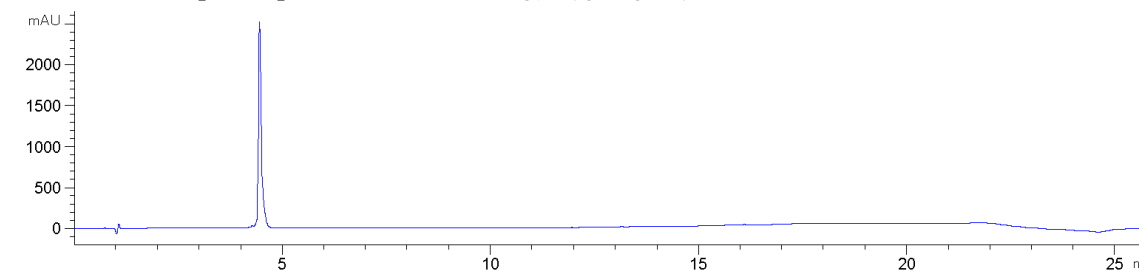

**HBS Sheet 9:**  $[M+H]^+$  Calculated for  $C_{53}H_{93}N_{15}O_{20}S_2$  – 1323.62; Observed = 1322.54

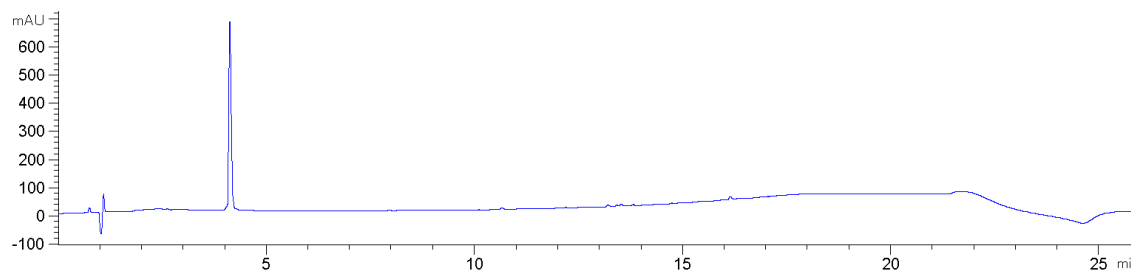

**HBS Sheet 10:**  $[M+H]^+$  Calculated for  $C_{62}H_{92}N_{15}O_{18}S_2$  – 1398.62; Observed = 1398.82

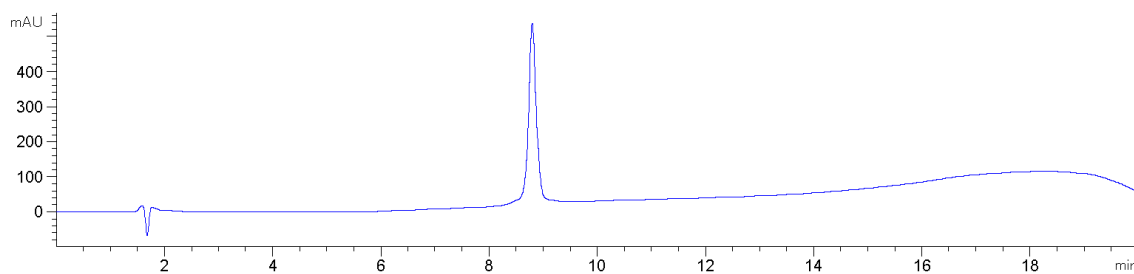

**HBS Sheet 11:**  $[M+H]^+$  Calculated for  $C_{60}H_{103}N_{14}O_{18}S_2$  – 1371.70; Observed = 1372.14

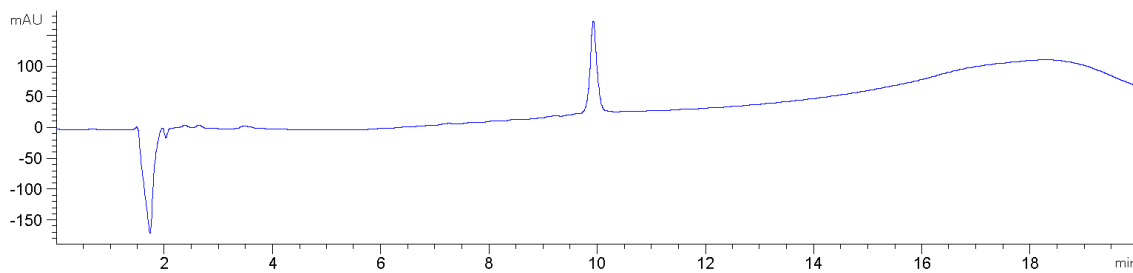

**1-Linear:**  $[M+H]^+$  Calculated for  $C_{60}H_{103}N_{14}O_{18}S_2$  - 1439.64; Observed  $m/z$  = 1439.53

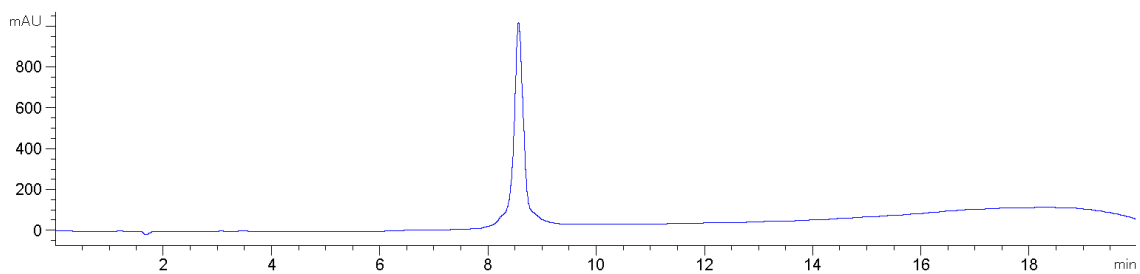



## NMR Spectroscopy

Experiments for **5** were performed on a Bruker AV-4 800 MHz NMR Spectrometer at 277 K and 298 K. TOCSY and ROESY mixing times were 80 ms and 200 ms, respectively. HBS Sheet **5** was dissolved in 20 mM sodium phosphate buffer, pH 6.0, at 1.3 mM. NMR analyses on peptides **1** and **3** were performed on a Bruker AVANCE III-600 MHz NMR Spectrometer at 298 K. These two peptides were dissolved in the same buffer as **5** with concentrations above 0.6 mM. Proton, TOCSY, and ROESY spectra were acquired using Watergate solvent suppression. TOCSY and ROESY mixing times were 60 and 200 ms, respectively. Spectral data were processed using Bruker TOPSPIN program.

Resonance assignments,  $^3\text{J}_{\text{NHC}\alpha\text{H}}$  coupling constants, and calculated  $\phi$  angles are reported below for HBS Sheet 5 at 277 K. NOE cross-peaks and distance constraints for **5** are reported below. Phi angles are reported as the lowest-energy conformer.

### 5 - 277 K Table & NOE Assignment

| Residue | HN    | H $\alpha$ | H $\beta$ , H $\beta'$ | Other                                                                                                                          | $\phi$ |
|---------|-------|------------|------------------------|--------------------------------------------------------------------------------------------------------------------------------|--------|
| Thr1    | 8.109 | 4.395      | 3.709                  | $\gamma$ (0.825)                                                                                                               | -159.4 |
| Trp2    | 8.484 | 4.621      | 2.835, 2.748           | $\epsilon$ 1 (9.862)<br>$\zeta$ 2 (6.940)<br>$\delta$ (6.925)<br>$\epsilon$ 3 (6.803)<br>$\eta$ 2 (6.781)<br>$\zeta$ 3 (6.651) | -166.3 |
| Glu3    | 8.743 | 4.390      | 1.661, 1.491           | $\gamma$ (1.858)                                                                                                               | -138.7 |
| Thr4    | 8.532 | 4.496      | 3.850                  | $\gamma$ (0.991)                                                                                                               | -124.0 |
| Thr5    | 8.291 | 4.271      | 3.659                  | $\gamma$ (0.777)                                                                                                               | -110.9 |
| Tyr6    | 8.198 | 4.113      | 2.082, 1.339           | $\delta$ (5.816), $\epsilon$ (6.161)                                                                                           | -111.4 |
| Arg7    | 8.252 | 4.086      | 1.257, 1.161           | $\gamma$ (1.057), $\gamma'$ (1.001), $\delta$ (2.712), $\epsilon$ (6.966)                                                      | -117.0 |
| Val8    | 8.212 | 4.012      | 1.676                  | $\gamma$ (0.607), $\gamma'$ (0.641)                                                                                            | -98.7  |

NMR Signal Table – Strong is 2.5 +/- 1.0 Å, Medium is 3.0 +/- 1.0 Å, Weak is 4.0 +/- 1.0 Å.

| Proton 1 (chemical shift) | Proton 2 (chemical shift) | Strength (Distance constraint) |
|---------------------------|---------------------------|--------------------------------|
| $\epsilon$ 1 W2 (9.862)   | H $\epsilon$ Y6 (6.161)   | Medium                         |
| $\epsilon$ 1 W2 (9.862)   | H $\delta$ Y6 (5.816)     | Weak                           |
| NH E3 (8.743)             | NH T5 (8.291)             | Medium                         |
| NH E3 (8.743)             | H $\alpha$ W2 (4.621)     | Strong                         |
| NH E3 (8.743)             | H $\beta$ W2 (2.835)      | Weak                           |

|                         |                         |        |
|-------------------------|-------------------------|--------|
| NH E3 (8.743)           | H $\gamma$ E3 (1.858)   | Medium |
| NH E3 (8.743)           | H $\beta$ E3 (1.661)    | Medium |
| NH E3 (8.743)           | H $\beta'$ E3 (1.491)   | Strong |
| NH T4 (8.532)           | H $\alpha$ E3 (4.390)   | Strong |
| NH T4 (8.532)           | H $\beta$ T4 (3.850)    | Strong |
| NH T4 (8.532)           | H $\beta$ E3 (1.661)    | Medium |
| NH T4 (8.532)           | H $\gamma$ T4 (0.991)   | Strong |
| NH W2 (8.484)           | H $\delta$ W2 (6.926)   | Medium |
| NH W2 (8.484)           | H $\alpha$ T1 (4.395)   | Strong |
| NH W2 (8.484)           | H $\beta$ T1 (3.709)    | Strong |
| NH W2 (8.484)           | H $\beta$ W2 (2.844)    | Strong |
| NH W2 (8.484)           | H $\beta'$ W2 (2.748)   | Strong |
| NH T5 (8.290)           | $\epsilon_3$ W2 (6.803) | Medium |
| NH T5 (8.290)           | H $\beta$ T5 (3.659)    | Strong |
| NH T5 (8.290)           | H $\gamma$ T5 (0.777)   | Strong |
| NH R7 (8.252)           | H $\alpha$ Y6 (4.113)   | Strong |
| NH R7 (8.252)           | H $\delta$ R7 (2.712)   | Weak   |
| NH R7 (8.252)           | H $\beta$ R7 (1.257)    | Strong |
| NH R7 (8.252)           | H $\beta'$ R7 (1.161)   | Strong |
| NH R7 (8.252)           | NH T1 (8.109)           | Medium |
| NH R7 (8.252)           | H $\gamma$ R7 (1.057)   | Weak   |
| NH R7 (8.252)           | H $\gamma'$ R7 (1.001)  | Medium |
| NH V8 (8.212)           | H $\alpha$ R7 (4.086)   | Strong |
| NH V8 (8.212)           | H $\beta$ V8 (1.676)    | Strong |
| NH V8 (8.212)           | H $\gamma$ V8 (0.607)   | Strong |
| NH V8 (8.212)           | H $\gamma'$ V8 (0.641)  | Weak   |
| NH Y6 (8.198)           | H $\delta$ Y6 (6.653)   | Weak   |
| NH Y6 (8.198)           | H $\alpha$ T5 (4.271)   | Strong |
| NH Y6 (8.198)           | H $\beta$ T5 (3.656)    | Strong |
| NH Y6 (8.198)           | H $\beta$ Y6 (2.082)    | Strong |
| NH Y6 (8.198)           | H $\beta'$ Y6 (1.339)   | Medium |
| NH T1 (8.109)           | H $\beta$ T1 (3.706)    | Strong |
| NH T1 (8.109)           | H $\gamma$ T1 (0.825)   | Strong |
| NH T1 (8.109)           | H $\beta$ R7 (1.257)    | Weak   |
| H $\epsilon$ R7 (6.966) | H $\gamma$ R7 (1.057)   | Medium |
| H $\epsilon$ R7 (6.966) | H $\gamma'$ R7 (1.001)  | Medium |
| H $\epsilon$ R7 (6.966) | H $\beta$ R7 (1.257)    | Weak   |
| H $\epsilon$ R7 (6.966) | H $\beta'$ R7 (1.161)   | Weak   |
| H $\delta$ W2 (6.926)   | H $\epsilon$ Y6 (6.159) | Medium |
| H $\delta$ W2 (6.926)   | H $\delta$ Y6 (5.816)   | Medium |
| H $\delta$ W2 (6.926)   | H $\beta$ W2 (2.844)    | Strong |
| H $\delta$ W2 (6.926)   | H $\beta'$ W2 (2.748)   | Strong |
| H $\delta$ W2 (6.926)   | H $\alpha$ T1 (4.392)   | Medium |
| $\epsilon_3$ W2 (6.803) | H $\epsilon$ Y6 (6.159) | Weak   |
| $\epsilon_3$ W2 (6.803) | H $\delta$ Y6 (5.816)   | Medium |

|                         |                        |        |
|-------------------------|------------------------|--------|
| $\epsilon_3$ W2 (6.803) | H $\alpha$ W2 (4.623)  | Medium |
| $\epsilon_3$ W2 (6.803) | H $\beta$ W2 (2.844)   | Medium |
| $\epsilon_3$ W2 (6.803) | H $\beta'$ W2 (2.748)  | Weak   |
| $\epsilon_3$ W2 (6.803) | H $\beta'$ Y6 (1.339)  | Weak   |
| $\zeta_3$ W2 (6.651)    | NH Y6 (8.198)          | Weak   |
| $\zeta_3$ W2 (6.651)    | H $\alpha$ T5 (4.271)  | Strong |
| $\zeta_3$ W2 (6.651)    | H $\beta'$ Y6 (1.339)  | Weak   |
| H $\epsilon$ Y6 (6.159) | H $\gamma$ V8 (0.607)  | Strong |
| H $\epsilon$ Y6 (6.159) | H $\gamma'$ V8 (0.641) | Medium |
| H $\delta$ Y6 (5.816)   | H $\alpha$ Y6 (4.113)  | Strong |
| H $\delta$ Y6 (5.816)   | H $\beta$ Y6 (2.082)   | Strong |
| H $\delta$ Y6 (5.816)   | H $\beta'$ Y6 (1.339)  | Weak   |
| H $\delta$ Y6 (5.816)   | H $\gamma$ V8 (0.607)  | Medium |

### ***Molecular Modeling of 5 from 277 K NOE Constraints***

A starting structure for HBS Sheet **5** peptide was derived from a segment from PDB 5E95 in PyMol. This was then transferred to MacroModel for incorporation of linkers and further modifications.  $^3\text{JNHC}_\alpha\text{H}$  coupling constants were obtained from the 1D spectra and torsion angles calculated from Pardi parameterized Karplus equation<sup>[8]</sup>. A total of 8 dihedrals (+/- 20 degrees) and all NOEs listed in the previous table were used to constrain a conformational search in MacroModel using the OPLS4 force field and mixed torsional and low-mode sampling. The 20 lowest energy structures were generated.

### ***5 NMR NOE-Constrained Model Spectra at 277 K TOCSY (Blue) ROESY (Gold)***

**Amide Fingerprint Region**

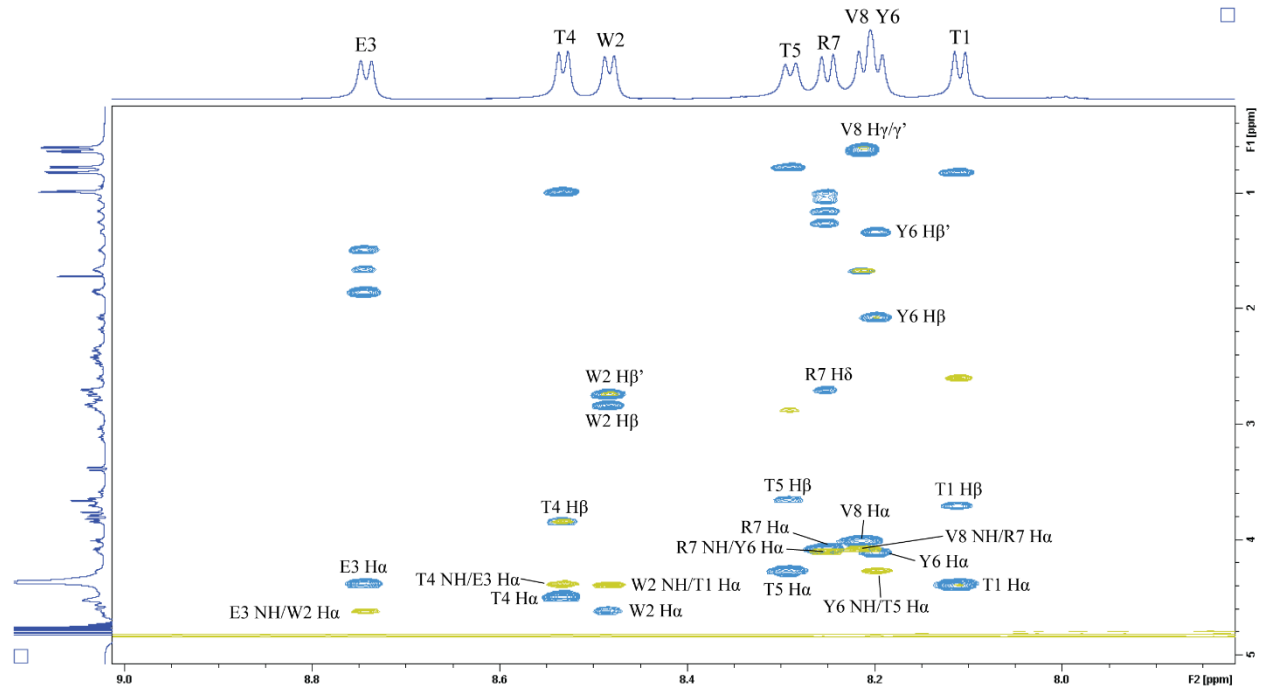

**Aromatic - Aliphatic Region**

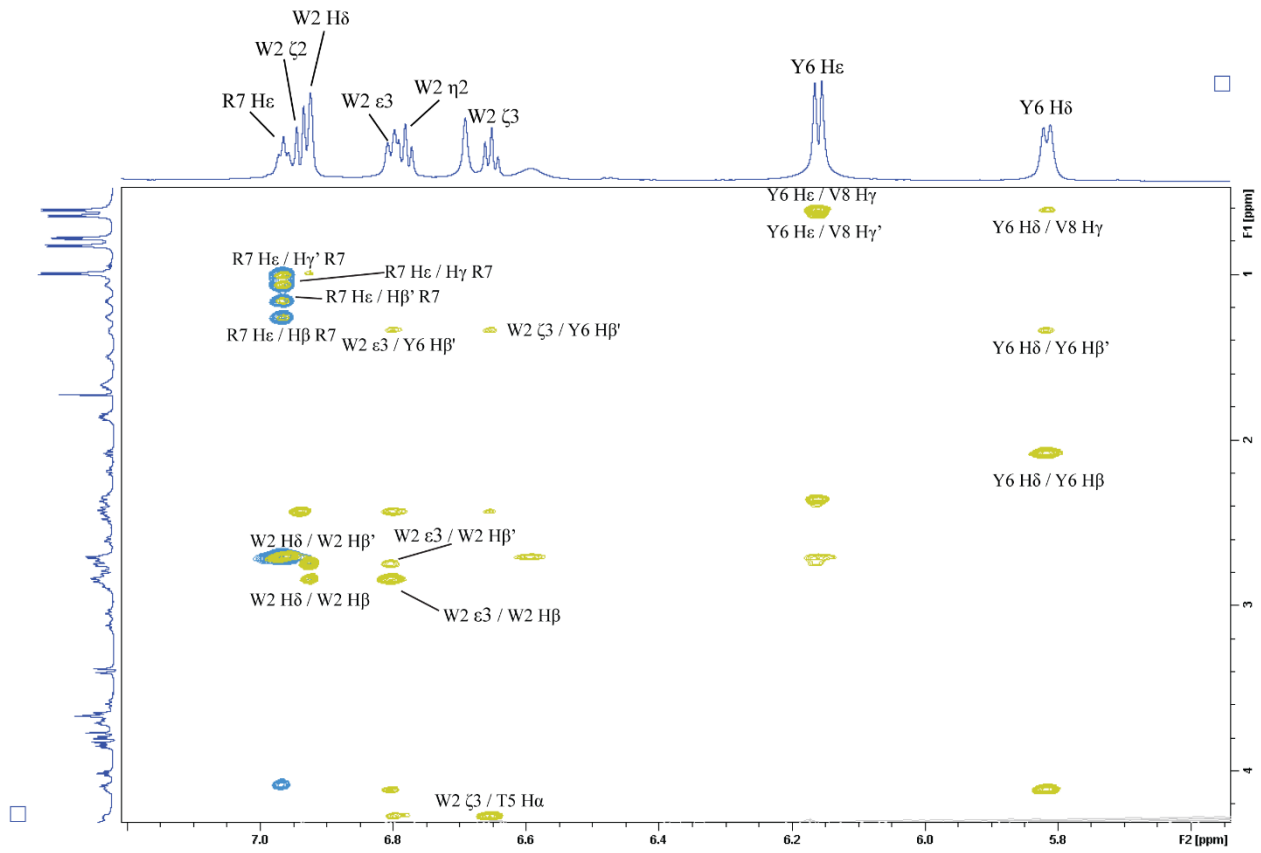

***Aromatic - Aromatic Region***

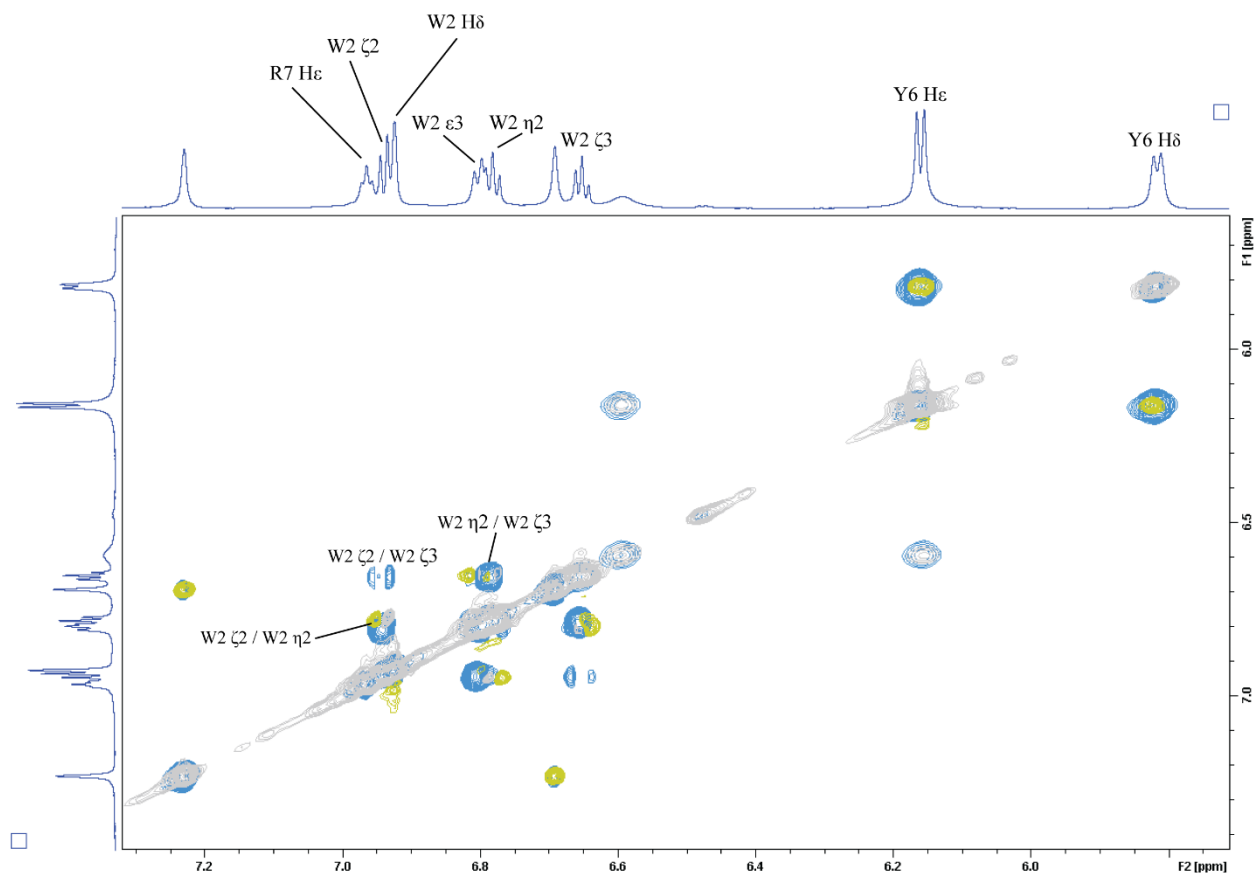

***Trp - Aromatic Region***

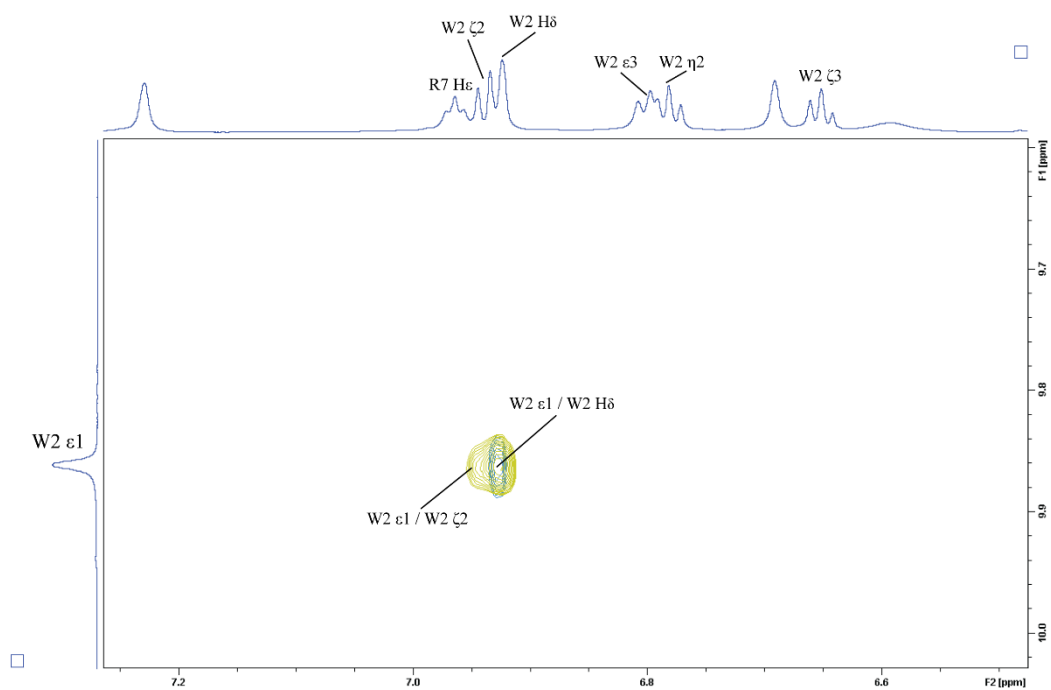

## H $\alpha$ for HBS Peptides Utilized in 2D NMR Analyses at 298 K

$\varphi_2, \varphi_1$  notation for HBS Sheet peptides with number assignment at 298 K on a Bruker AVANCE III-600 MHz NMR Spectrometer, with HBS Sheet 5 done at 298 K on a Bruker AV4-800 MHz NMR Spectrometer as previously mentioned.

|            | W-W         | Chx-W       | W-Y         |
|------------|-------------|-------------|-------------|
| H $\alpha$ | HBS Sheet 1 | HBS Sheet 3 | HBS Sheet 5 |
| T1         | 4.408       | 4.352       | 4.609       |
| E3         | 4.525       | 4.512       | 4.615       |
| T4         | 4.617       | 4.745       | 4.753       |
| T5         | 4.427       | 4.568       | 4.498       |
| R7         | 4.377       | 4.507       | 4.322       |
| V8         | 4.305       | 4.414       | 4.263       |

### *Chemical Shift Deviation Calculations*

Chemical shift deviations were taken from H $\alpha$  values recorded above and subtracted from random coil H $\alpha$  values defined by Wishart et.al.<sup>[9]</sup>

### *1 - Amide Fingerprint Region TOCSY (Blue) ROESY (Gold)*

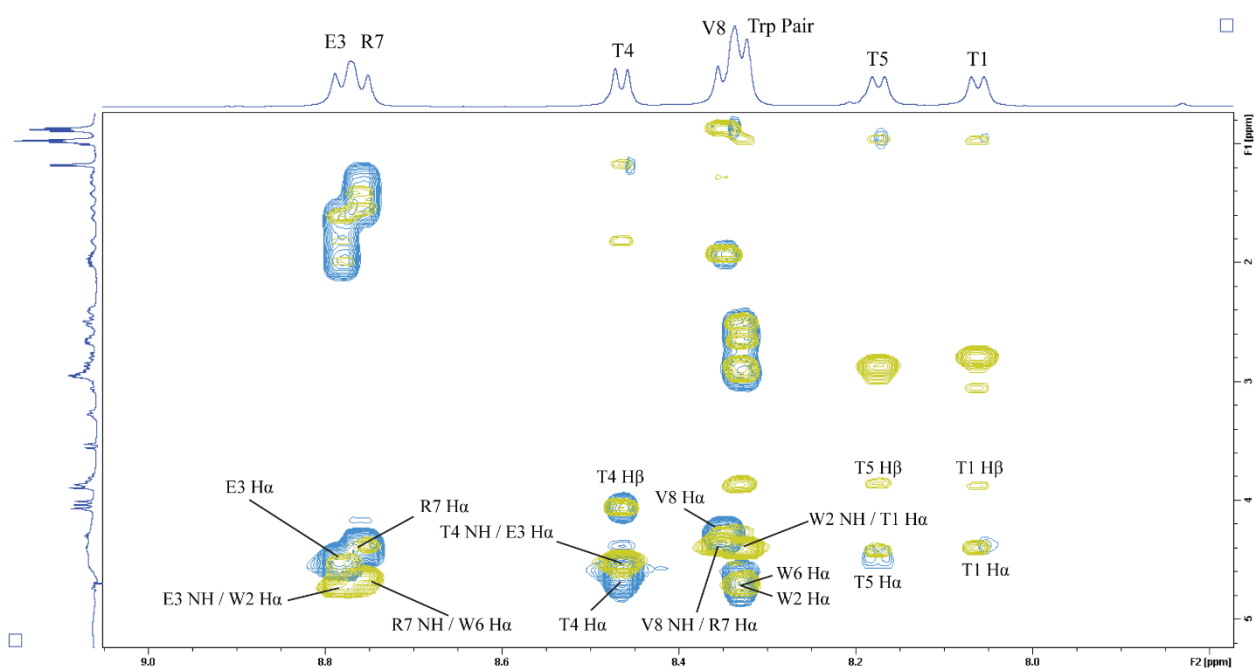

**3 - Amide Fingerprint Region TOCSY (Blue) ROESY (Gold)**

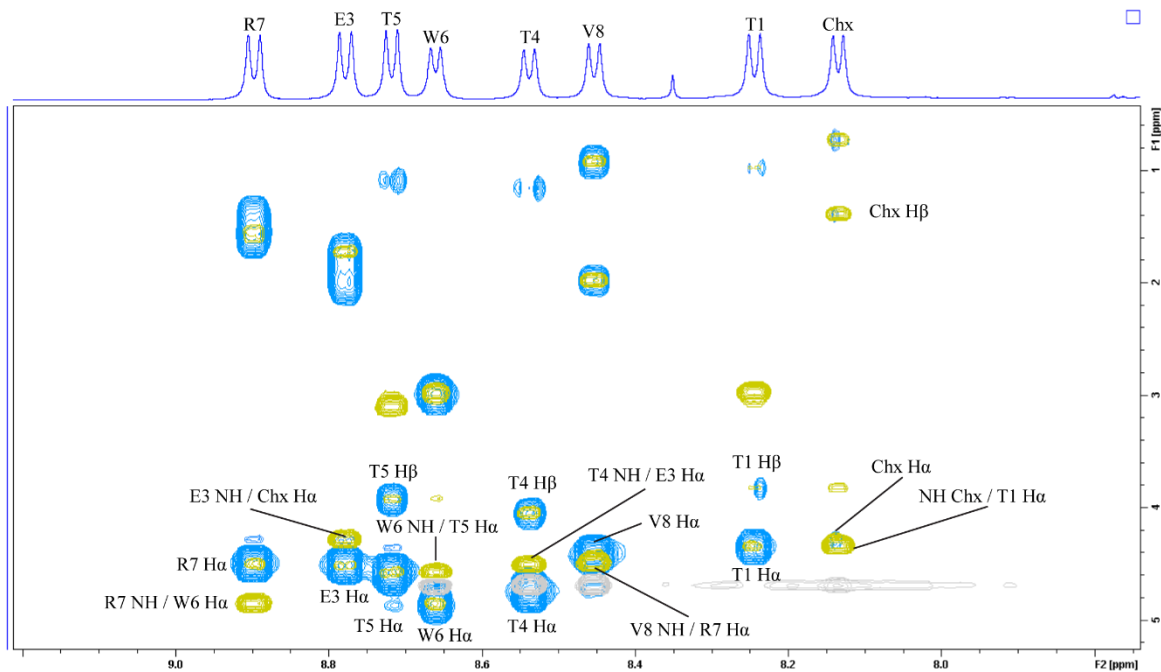

**5 - Amide Fingerprint Region at 298 K TOCSY (Blue) ROESY (Purple)**

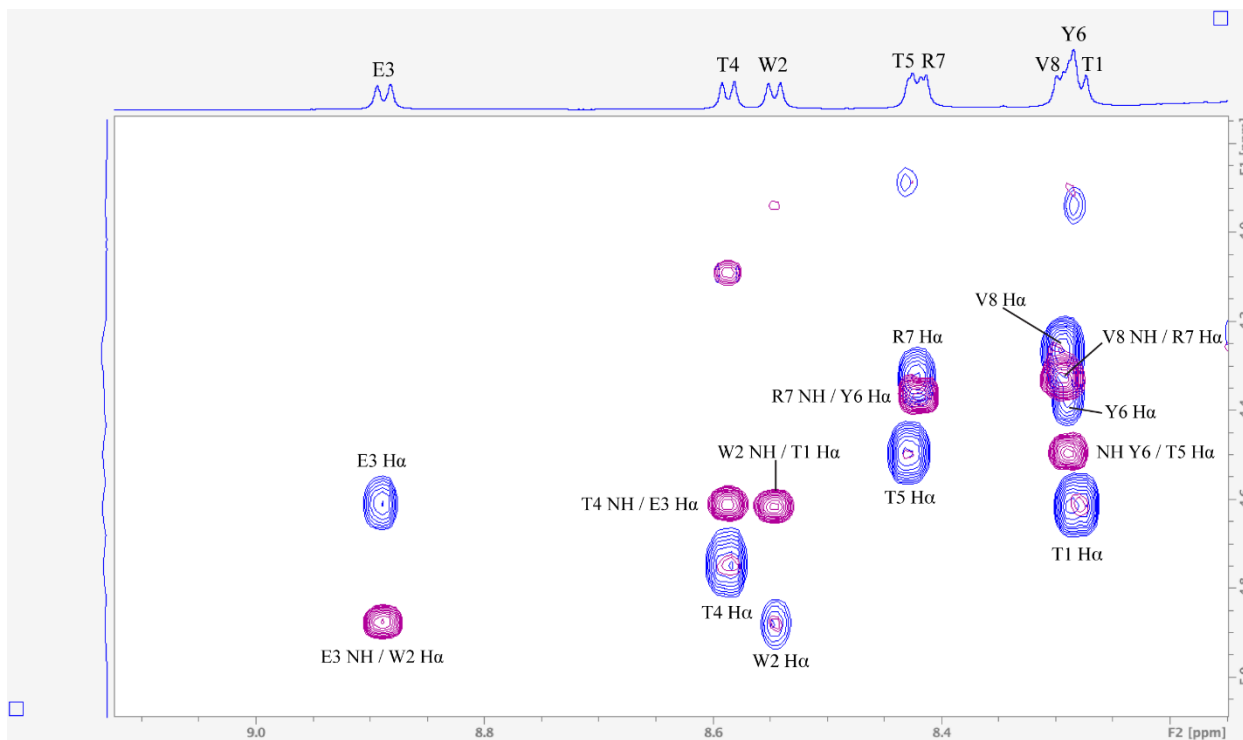

## Supplementary References

- [1] W. Kabsch, C. Sander, *Biopolymers* **1983**, *22*, 2577-2637.
- [2] M. Tsutsumi, J. M. Otaki, *J. Chem. Inf. Model* **2011**, *51*, 1457-1464.
- [3] D. K. Schneider, A. S. Soares, E. O. Lazo, D. F. Kreitler, K. Qian, M. R. Fuchs, D. K. Bhogadi, S. Antonelli, S. S. Myers, B. S. Martins, J. M. Skinner, J. Aishima, H. J. Bernstein, T. Langdon, J. Lara, R. Petkus, M. Cowan, L. Flaks, T. Smith, G. Shea-McCarthy, M. Idir, L. Huang, O. Chubar, R. M. Sweet, L. E. Berman, S. McSweeney, J. Jakoncic, *Journal of Synchrotron Radiation* **2022**, *29*, 1480-1494.
- [4] C. Vonrhein, C. Flensburg, P. Keller, A. Sharff, O. Smart, W. Paciorek, T. Womack, G. Bricogne, *Acta Crystallogr D Biol Crystallogr* **2011**, *67*, 293-302.
- [5] I. J. Tickle, C. Flensburg, P. Keller, W. Paciorek, A. Sharff, C. Vonrhein, G. Bricogne, *Vol. 2020*, Global Phasing Ltd., Cambridge, UK, **2018**.
- [6] P. Emsley, B. Lohkamp, W. G. Scott, K. Cowtan, *Acta Crystallogr D Biol Crystallogr* **2010**, *66*, 486-501.
- [7] E. F. Pettersen, T. D. Goddard, C. C. Huang, E. C. Meng, G. S. Couch, T. I. Croll, J. H. Morris, T. E. Ferrin, *Protein Sci* **2021**, *30*, 70-82.
- [8] A. Pardi, M. Billeter, K. Wuthrich, *J. Mol. Biol.* **1984**, *180*, 741-751.
- [9] D. S. Wishart, C. G. Bigam, A. Holm, R. S. Hodges, B. D. Sykes, *J. Biomol. NMR* **1995**, *5*, 332-332.
